# Supplementary material for: Specific MHC-I Peptides Are Induced Using PROTACs
Source: PubMed Central journal article supplement (PMC6262898; doi:10.3389/fimmu.2018.02697), 2018-11-22
Supplement: Table_6.pdf [file Table_6.pdf]

| <u>Sequence</u> | <u>Accession</u> | <u>Gene Name</u> | <u>Description</u>                                                                            |
|-----------------|------------------|------------------|-----------------------------------------------------------------------------------------------|
| RLTPKLMEV       | O15372           | EIF3H            | Eukaryotic translation initiation factor 3 subunit H                                          |
| YLPPATQVV       | P38919           | EIF4A3           | Eukaryotic initiation factor 4A-III                                                           |
| TLLHAGGLARA     | P0C7U0           | ELFN1            | Protein ELFN1                                                                                 |
| TLFPGKVHSL      | Q9NNW5           | WDR6             | WD repeat-containing protein 6                                                                |
| KILPTLEAV       | Q12905           | ILF2             | Interleukin enhancer-binding factor 2                                                         |
| SLLPEGPPAI      | Q15011           | HERPUD1          | Homocysteine-responsive endoplasmic reticulum-resident ubiquitin-like domain member 1 protein |
| SLADLQNDDEV     | P61247           | RPS3A            | 40S ribosomal protein S3a                                                                     |
| LLLDVPTAAVQA    | P13284           | IFI30            | Gamma-interferon-inducible lysosomal thiol reductase                                          |
| NMVAKVDEV       | P62906           | RPL10A           | 60S ribosomal protein L10a                                                                    |
| VLSSRLAFA       | P79483           | HLA-DRB3         | HLA class II histocompatibility antigen, DR beta 3 chain                                      |
| TLDEKIEKV       | Q96GQ7           | DDX27            | Probable ATP-dependent RNA helicase DDX27                                                     |
| VMDSKIVQV       | O15131           | KPNA5            | Importin subunit alpha-6                                                                      |
| ALSDGVHKI       | Q9NVQ4           | FAIM             | Fas apoptotic inhibitory molecule 1                                                           |
| TLADLVHHV       | Q9Y4A5           | TRRAP            | Transformation/transcription domain-associated protein                                        |
| LMTKEISSV       | P78527           | PRKDC            | DNA-dependent protein kinase catalytic subunit                                                |
| TLYEAVREV       | P62906           | RPL10A           | 60S ribosomal protein L10a                                                                    |
| LLDEPTNHL       | Q9UG63           | ABCF2            | ATP-binding cassette sub-family F member 2                                                    |
| SLNGLEVHL       | Q9NQG7           | HPS4             | Hermansky-Pudlak syndrome 4 protein                                                           |
| QLAQFVHEV       | A8MPP1           | DDX11L8          | Putative ATP-dependent RNA helicase DDX11-like protein 8                                      |
| ALSDHHIYL       | P04075           | ALDOA            | Fructose-bisphosphate aldolase A                                                              |
| KVAPAPAVV       | P62424           | RPL7A            | 60S ribosomal protein L7a                                                                     |
| YTSPVNPAV       | P61165           | TMEM258          | Transmembrane protein 258                                                                     |
| FLSEEGGHVAV     | Q16877           | PFKFB4           | 6-phosphofructo-2-kinase/fructose-2,6-bisphosphatase 4                                        |
| RLQESVMEA       | O60216           | RAD21            | Double-strand-break repair protein rad21 homolog                                              |
| TLTEEGVIKV      | Q9BZE4           | GTPBP4           | Nucleolar GTP-binding protein 1                                                               |
| SMSADVPLV       | P12004           | PCNA             | Proliferating cell nuclear antigen                                                            |
| KLDAFVEGV       | P21283           | ATP6V1C1         | V-type proton ATPase subunit C 1                                                              |
| GLIDRQVTV       | Q9UPN3           | MACF1            | Microtubule-actin cross-linking factor 1, isoforms 1/2/3/5                                    |
| FLDPNNIPKA      | Q9BVK2           | ALG8             | Probable dolichyl pyrophosphate Glc1Man9GlcNAc2 alpha-1,3-glucosyltransferase                 |

**Table S6. Housekeeping peptide list:** 29 peptides and source proteins used for sample abundance (XIC AUC) normalization.
